# Supplementary material for: Forcing dimethylacridine crooking to improve the efficiency of orange-red thermally activated delayed fluorescent emitters
Source: Royal Society of Chemistry journal article supplement (doi:10.1039/d0tc02289f), 2020-01-01

## **Supporting Information**

### **Forcing Dimethylacridine Crooked to Improve the Efficiency of Orange-**

### **Red Thermally Activated Delayed Fluorescent Emitters**

Feng-Yan Hao,<sup>‡</sup> Yi-Zhong Shi,<sup>‡</sup> Kai Wang,<sup>\*</sup> Xiao-Chun Fan, Lin Wu, Jun Ye,<sup>\*</sup> Cai-Jun Zheng, Yan-Qing Li, Xue-Mei Ou and Xiao-Hong Zhang<sup>\*</sup>

## **Contents**

- 1. General Information**
- 2. Experimental procedures**
- 3. Theoretical Simulation Results**
- 4. Electrochemical Properties**
- 5. TGA and DSC Measurements**
- 6. Photophysical Properties**
- 7. Device Fabrication and Characterization**
- 8. Nuclear Magnetic Resonance Spectra**

## 1. General Information

All reagents and solvents were commercially available without further purification. Nuclear magnetic resonance (NMR) spectral data were obtained using a Bruker Advance-400 spectrometer with chemical shifts reported in ppm. The Absorption and photoluminescence (PL) spectra were obtained using a Hitachi ultraviolet-visible (UV-Vis) spectrophotometer U-3010 and a Hitachi fluorescence spectrometer F-4600, respectively. The transient photoluminance decay characteristics were measured using an Edinburgh Instruments F980 spectrometer. The photoluminescence quantum yield of the doped solid film was obtained using a QY-2000 Fluorescence Spectrometer and estimated via an F-3018 Integrating Sphere. Lastly, cyclic voltammetry (CV) was performed using a CHI660E electrochemical analyzer. The theoretical calculations were performed using the Gaussian-09 program. Density functional theory (DFT) B3LYP/6-31G (d) was used to determine and optimize the structures.

## 2. Experimental procedures

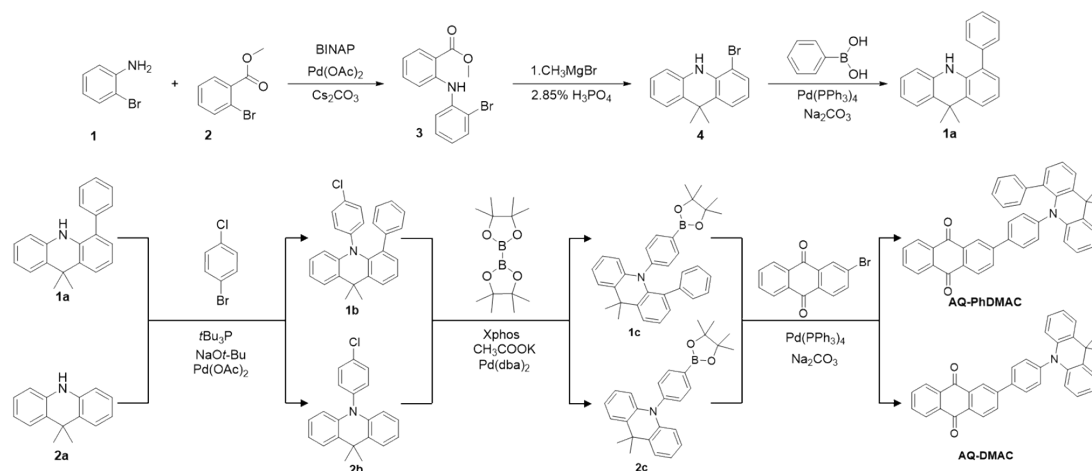

**Scheme S1.** Experimental procedure of AQ-PhDMAC and AQ-DMAC.

**Synthesis of methyl 2-((2-bromophenyl)amino)benzoate (3):** A mixture of 2-bromoaniline (5.2 g, 30.0 mmol), methyl 2-bromobenzoate (7.1 g, 33.0 mmol), Pd(OAc)<sub>2</sub> (336.8 mg, 1.5 mmol), BINAP (1.9 g, 3.0 mmol) and Cs<sub>2</sub>CO<sub>3</sub> (19.0 g, 60.0 mmol) was stirred and refluxed in anhydrous toluene (80 mL) for overnight under the N<sub>2</sub>. After cooled to room temperature and the solvent had been removed, the residue was purified by column chromatography on silica gel using petroleum ether/dichloromethane (8/1, v/v) as the eluent to afford **3** as a colorless oil, with a yield of 57 % (5.3 g). <sup>1</sup>H NMR (600 MHz, DMSO-*d*<sub>6</sub>) δ 9.47 (s, 1H), 7.91 (dd, *J* = 8.0, 1.7 Hz, 1H), 7.68 (dd, *J* = 8.0, 1.4 Hz, 1H), 7.49 (dd, *J* = 8.1, 1.5 Hz, 1H), 7.43 (ddd, *J* = 8.7, 7.1, 1.7 Hz, 1H), 7.37 – 7.32 (m, 1H), 7.16 (dd, *J* = 8.5, 1.1 Hz, 1H), 7.01 (ddd, *J* = 8.1, 7.3, 1.5 Hz, 1H), 6.87 (ddd, *J* = 8.1, 7.2, 1.1 Hz, 1H), 3.85 (s, 3H). MS (EI) *m/z*: [M]<sup>+</sup> calcd for C<sub>14</sub>H<sub>12</sub>BrNO<sub>2</sub>, 305.01; found, 305.07.

**Synthesis of 4-bromo-9,9-dimethyl-9,10-dihydroacridine (4):** The methyl 2-((2-bromophenyl)amino)benzoate (3.4 g, 11.1 mmol) was dissolved in anhydrous tetrahydrofuran (60 mL) under argon and cooled to -10 °C. Then methyl magnesium bromide (CH<sub>3</sub>MgBr, 3 M in THF, 8 mL, 24.0 mmol) was added dropwise under stirred. After 2 h reaction at 0 °C, the mixture was gradually warmed up to 35 °C and reacted overnight. After the completion of the reaction, it was quenched by water (2 mL). Then the solvent was removed and the crude product was used without further purified. A mixture of the crude product in 85 % phosphoric acid (50 mL) was stirred at 35 °C for 5 h. The reaction mixture was then poured into ice and extracted with

ethyl acetate and water. The organic layer was dried over anhydrous  $\text{MgSO}_4$ , and concentrated to give the crude product which was purified by column chromatography on silica gel using petroleum ether/dichloromethane (4/1, v/v) as the eluent to afford **4** as a colorless oil, with a yield of 62 % (2.0 g).  $^1\text{H}$  NMR (600 MHz,  $\text{DMSO}-d_6$ )  $\delta$  7.95 (s, 1H), 7.43 – 7.31 (m, 3H), 7.23 (dt,  $J = 8.0, 1.2$  Hz, 1H), 7.12 – 7.01 (m, 1H), 6.90 – 6.82 (m, 1H), 6.75 (td,  $J = 7.8, 1.0$  Hz, 1H), 1.51 – 1.41 (m, 6H). MS (EI)  $m/z$ :  $[\text{M}]^+$  calcd for  $\text{C}_{15}\text{H}_{14}\text{BrN}$ , 287.03; found, 287.09.

**Synthesis of 9,9-dimethyl-4-phenyl-9,10-dihydroacridine (1a):** A mixture of 4-bromo-9,9-dimethyl-9,10-dihydroacridine (2.0 g, 6.9 mmol), phenylboronic acid (0.9 g, 7.3 mmol),  $\text{Pd}(\text{PPh}_3)_4$  (0.4 g, 0.35 mmol) and  $\text{Na}_2\text{CO}_3$  (10 mL, 2 M) in degassed toluene (75 mL) and degassed ethanol (15 mL) was refluxed overnight under an  $\text{N}_2$  atmosphere. After cooled to room temperature and the solvent had been removed, the crude product was purified by column chromatography on silica gel using petroleum ether/dichloromethane (8/1, v/v) as the eluent to afford **1a** as a white solid, with a yield of 81 % (1.6 g).  $^1\text{H}$  NMR (400 MHz,  $\text{DMSO}-d_6$ )  $\delta$  7.59 – 7.53 (m, 2H), 7.50 – 7.39 (m, 6H), 7.07 – 6.92 (m, 4H), 6.90 – 6.85 (m, 1H), 1.58 (s, 6H). MS (EI)  $m/z$ :  $[\text{M}]^+$  calcd for  $\text{C}_{21}\text{H}_{19}\text{N}$ , 285.15; found, 285.18.

**Synthesis of 10-(4-chlorophenyl)-9,9-dimethyl-4-phenyl-9,10-dihydroacridine (1b):** A mixture of 9,9-dimethyl-4-phenyl-9,10-dihydroacridine (1.6 g, 5.6 mmol), 1-bromo-4-chlorobenzene (1.1 g, 5.7 mmol),  $\text{Pd}(\text{dba})_2$  (161.2 mg, 0.3 mmol), tri-butyl phosphine (0.5 mL, 0.8 mmol, 10 % in toluene) and sodium tert-butoxide (1.4 g, 14.0 mmol) was stirred and refluxed in toluene (60 mL) for overnight under the  $\text{N}_2$ . After cooled to room temperature and the solvent had been removed, the residue was purified by column chromatography on silica gel using petroleum ether/dichloromethane (8/1, v/v) as the eluent to afford **1b** as a white solid with a yield of 63 % (1.4 g).  $^1\text{H}$  NMR (600 MHz,  $\text{DMSO}-d_6$ )  $\delta$  7.65 – 7.56 (m, 3H), 7.45 (d,  $J = 7.8$  Hz, 3H), 7.38 (td,  $J = 7.7, 1.6$  Hz, 1H), 7.31 (dt,  $J = 14.5, 7.5$  Hz, 4H), 7.21 (t,  $J = 7.4$  Hz, 1H), 6.96 – 6.91 (m, 2H), 6.74 (dd,  $J = 9.0, 1.7$  Hz, 2H), 1.46 (s, 6H). MS (EI)  $m/z$ :  $[\text{M}]^+$  calcd for  $\text{C}_{27}\text{H}_{22}\text{ClN}$ , 395.14; found, 395.12.

**Synthesis of 10-(4-chlorophenyl)-9,9-dimethyl-9,10-dihydroacridine (2b):** **2b** was prepared with a similar procedure of **1b** with **2a** instead of **1a**. **2b** was obtained as a white solid with a yield of 83 % (1.9 g).  $^1\text{H}$  NMR (400 MHz,  $\text{DMSO}-d_6$ )  $\delta$  7.78 – 7.69 (m, 2H), 7.49 (dd,  $J = 7.7, 1.6$  Hz, 2H), 7.45 – 7.34 (m, 2H), 6.94 (dtd,  $J = 28.6, 7.3, 1.5$  Hz,

4H), 6.14 (dd,  $J = 8.2, 1.3$  Hz, 2H), 1.61 (s, 6H). MS (EI)  $m/z$ :  $[M]^+$  calcd for  $C_{21}H_{18}ClN$ , 319.83; found, 319.87.

**Synthesis of 9,9-dimethyl-4-phenyl-10-(4-(4,4,5,5-tetramethyl-1,3,2-dioxaborolan-2-yl)phenyl)-9,10-dihydroacridine (1c):** A mixture of 10-(4-chlorophenyl)-1-phenyl-10H-phenoxazine (1.4 g, 3.8 mmol), 4,4,4',4',5,5,5',5'-octamethyl-2,2'-bi(1,3,2-dioxaborolane) (1.9 g, 7.6 mmol),  $Pd(dba)_2$  (108.8 mg, 0.2 mmol), Xphos (270.7 mg, 0.6 mmol) and potassium acetate (0.9 g, 9.5 mmol) was stirred and refluxed in 1,4-dioxane (60 mL) for overnight under the  $N_2$ . After cooled to room temperature and the solvent had been removed, the residue was purified by column chromatography on silica gel using petroleum ether/dichloromethane (4/1, v/v) as the eluent to afford **1c** as a white solid, with a yield of 74% (1.3 g).  $^1H$  NMR (600 MHz,  $DMSO-d_6$ )  $\delta$  7.65 (d,  $J = 7.8$  Hz, 1H), 7.60 (d,  $J = 7.8$  Hz, 1H), 7.58 (d,  $J = 7.8$  Hz, 1H), 7.52 – 7.45 (m, 3H), 7.40 (t,  $J = 7.7$  Hz, 1H), 7.33 (t,  $J = 7.8$  Hz, 4H), 7.21 (t,  $J = 7.7$  Hz, 3H), 6.73 (d,  $J = 8.3$  Hz, 2H), 1.42 (s, 6H), 1.19 (s, 12H). MS (EI)  $m/z$ :  $[M]^+$  calcd for  $C_{33}H_{18}BNO_2$ , 487.25; found, 487.21.

**Synthesis of 9,9-dimethyl-10-(4-(4,4,5,5-tetramethyl-1,3,2-dioxaborolan-2-yl)phenyl)-9,10-dihydroacridine (2c):** **2c** was prepared with a similar procedure of **1c** with **2b** instead of **1b**. **2c** was obtained as a white solid with a yield of 78 % (1.9 g).  $^1H$  NMR (400 MHz,  $CDCl_3$ )  $\delta$  8.10 – 8.03 (m, 2H), 7.44 (dd,  $J = 7.0, 2.3$  Hz, 2H), 7.37 – 7.32 (m, 2H), 6.92 (pd,  $J = 7.2, 1.7$  Hz, 4H), 6.27 – 6.20 (m, 2H), 1.40 (s, 12H). MS (EI)  $m/z$ :  $[M]^+$  calcd for  $C_{27}H_{30}BNO_2$ , 411.24; found, 411.26.

**Synthesis of 2-(4-(9,9-dimethyl-4-phenylacridin-10(9H)-yl)phenyl)anthracene-9,10-dione (AQ-PhDMAC):** A mixture of 9,9-dimethyl-4-phenyl-10-(4-(4,4,5,5-tetramethyl-1,3,2-dioxaborolan-2-yl)phenyl)-9,10-dihydroacridine (1.0 g, 2.1 mmol), 2-bromoanthracene-9,10-dione (0.6 g, 2.1 mmol),  $Pd(PPh_3)_4$  (118.5 mg, 0.1 mmol) and  $Na_2CO_3$  (3 mL, 2 M) in degassed toluene (45 mL) and degassed ethanol (15 mL) were refluxed overnight under an  $N_2$  atmosphere. After cooling to room temperature and the solvent had been removed, the crude product was purified by column chromatography on silica gel using petroleum ether/dichloromethane (4/1, v/v) as the eluent to afford **AQ-PhDMAC** as orange solid, with a yield of 86 % (1.0 g).  $^1H$  NMR (400 MHz,  $DMSO-d_6$ )  $\delta$  8.24 – 8.13 (m, 4H), 8.02 (dd,  $J = 8.3, 2.0$  Hz, 1H), 7.96 – 7.88 (m, 2H), 7.73 (dd,  $J = 7.8, 1.3$  Hz, 1H), 7.63 (ddd,  $J = 9.6, 7.8, 1.5$  Hz, 2H), 7.57 – 7.46 (m, 5H), 7.43 (t,  $J = 7.7$  Hz, 1H), 7.36 (tdd,  $J = 7.1, 3.9, 1.8$  Hz, 4H), 7.24 – 7.18 (m, 1H), 6.92

(d,  $J = 9.0$  Hz, 2H), 1.49 (s, 6H).  $^{13}\text{C}$  NMR (151 MHz,  $\text{CDCl}_3$ )  $\delta$  183.43, 182.76, 146.28, 145.77, 145.53, 144.68, 142.26, 140.07, 139.09, 138.02, 134.02, 133.80, 133.72, 133.60, 131.01, 130.94, 129.20, 128.75, 128.56, 128.22, 127.87, 127.21, 127.14, 127.08, 126.21, 126.03, 125.49, 125.33, 124.62, 124.11, 123.57, 114.50, 38.58, 27.70. MS (EI)  $m/z$ :  $[\text{M}]^+$  calcd for  $\text{C}_{41}\text{H}_{29}\text{NO}_2$ , 567.22; found, 567.31.

**Synthesis of 2-(4-(9,9-dimethylacridin-10(9H)-yl)phenyl)anthracene-9,10-dione (AQ-DMAC):** AQ-DMAC was prepared with a similar procedure of AQ-PhDMAC with **2c** instead of **1c**. AQ-DMAC was obtained as an orange solid with a yield of 84 % (1.0 g).  $^1\text{H}$  NMR (400 MHz,  $\text{CDCl}_3$ )  $\delta$  8.66 (d,  $J = 1.9$  Hz, 1H), 8.51 – 8.32 (m, 3H), 8.14 (dd,  $J = 8.1, 1.9$  Hz, 1H), 8.00 (d,  $J = 8.2$  Hz, 2H), 7.89 – 7.79 (m, 2H), 7.57 – 7.41 (m, 4H), 7.08 – 6.87 (m, 4H), 6.35 (dd,  $J = 8.0, 1.3$  Hz, 2H), 1.72 (s, 6H).  $^{13}\text{C}$  NMR (151 MHz,  $\text{CDCl}_3$ )  $\delta$  182.90, 182.60, 145.66, 141.78, 140.49, 138.58, 134.04, 133.91, 133.78, 133.41, 133.37, 132.17, 131.88, 129.91, 129.58, 127.98, 127.11, 127.05, 126.19, 125.48, 125.09, 120.54, 113.80, 35.78, 31.05. MS (EI)  $m/z$ :  $[\text{M}]^+$  calcd for  $\text{C}_{35}\text{H}_{25}\text{NO}_2$ , 491.19; found, 491.23.

### 3. Theoretical Simulation Results

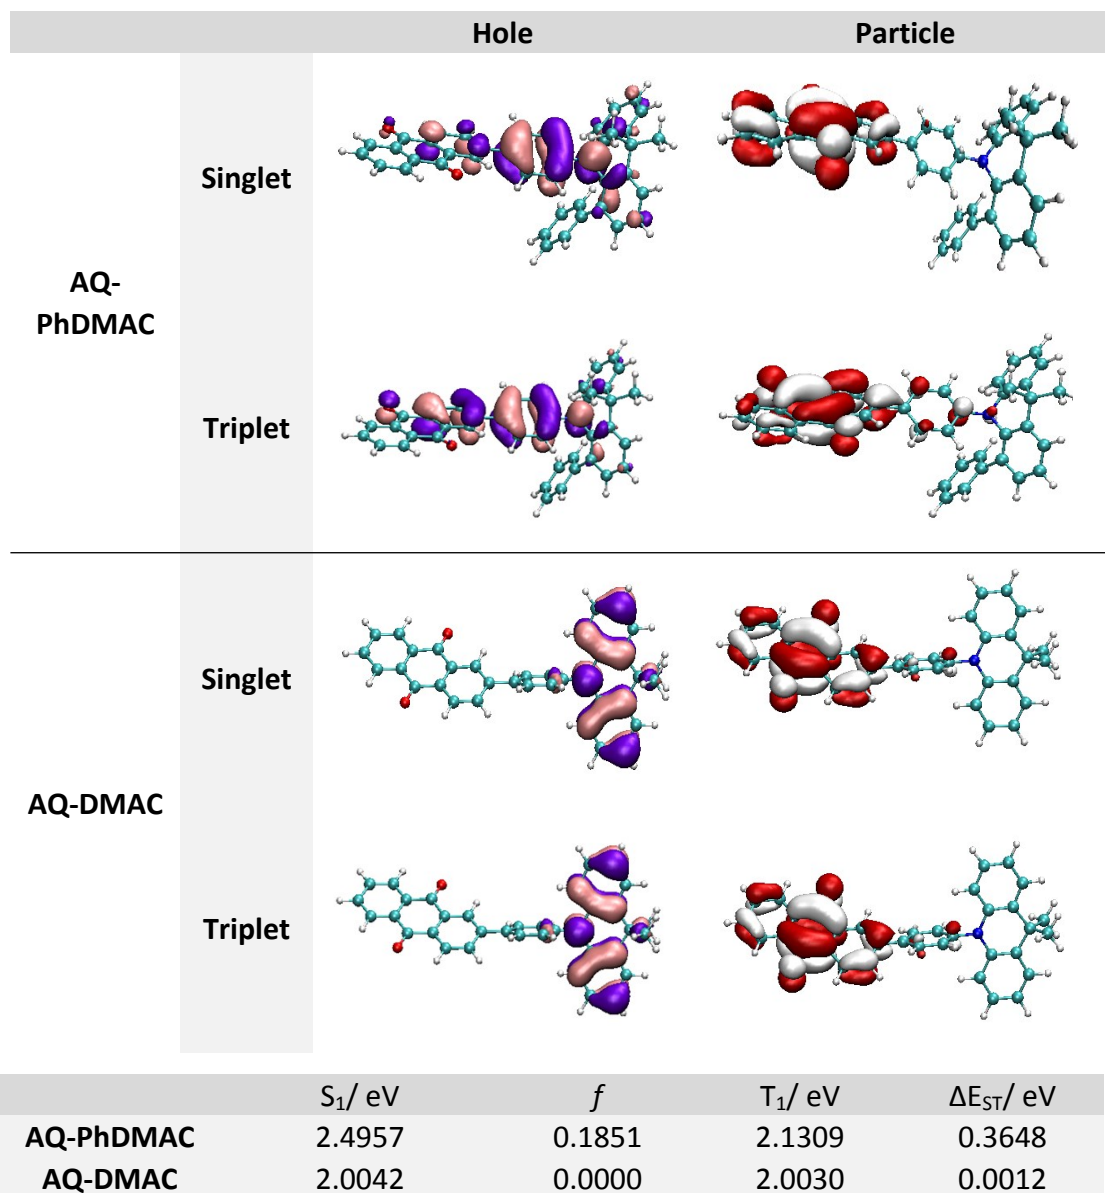

**Fig. S1** Natural transition orbitals (NTO) analysis of the lowest excited states based on the optimal ground state geometry for AQ-PhDMAC and AQ-DMAC.

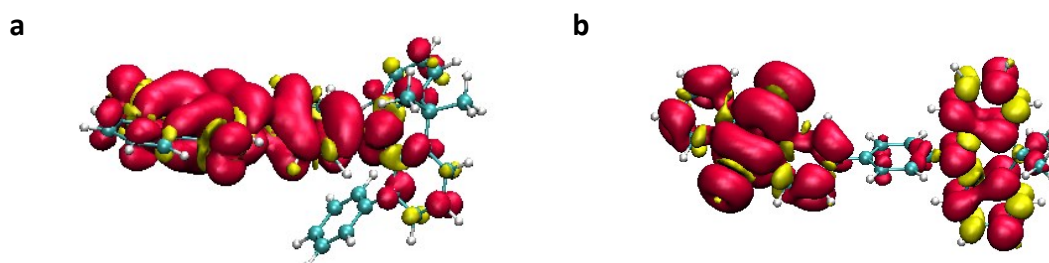

**Fig. S2** Calculated spin density distributions of the lowest excited triplet states of a) AQ-PhDMAC and b) AQ-DMAC. The isovalue is 0.0004.



#### 4. Electrochemical Properties

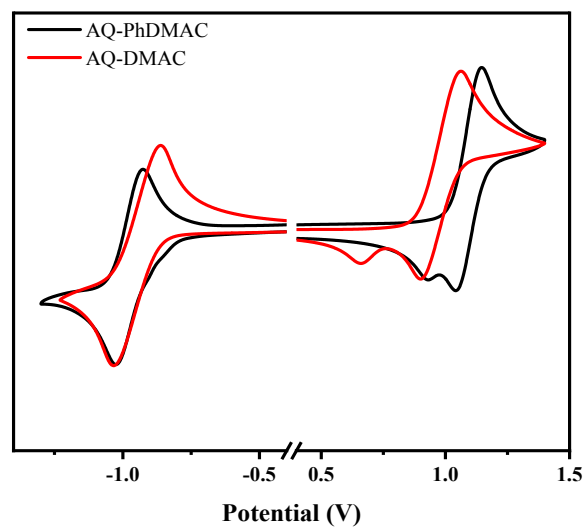

**Fig. S3** Cyclic voltammograms of AQ-PhDMAC and AQ-DMAC in DCM.

#### 5. TGA and DSC Measurements

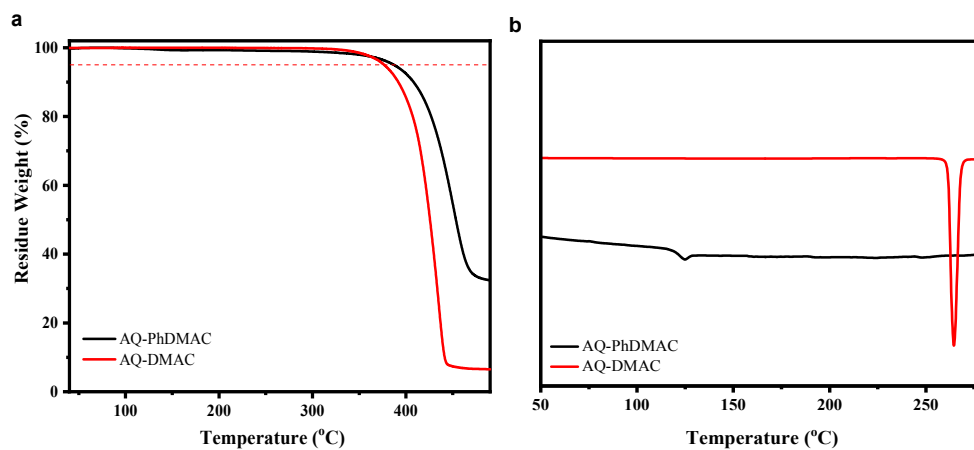

**Fig. S4** a) TGA and b) DSC results of AQ-PhDMAC and AQ-DMAC.

## 6. Photophysical Properties

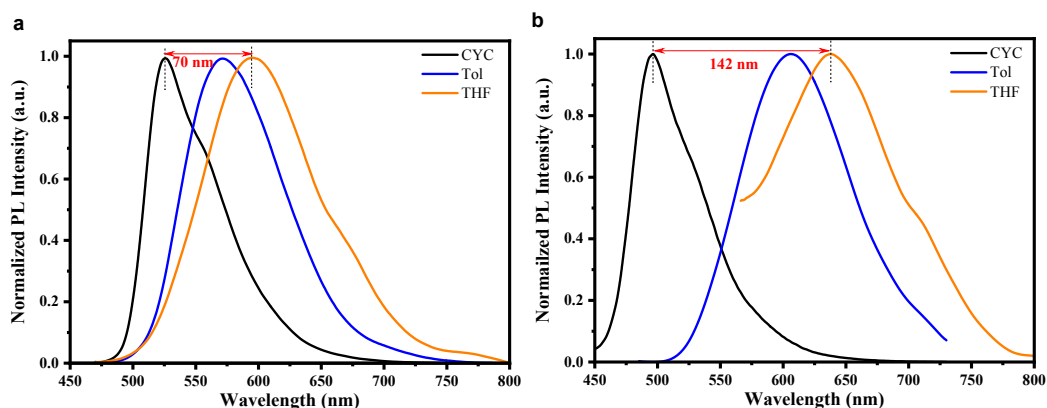

**Fig. S5** Emission spectra of a) AQ-PhDMAC and b) AQ-DMAC in cyclohexane (CYC), toluene (Tol), and tetrahydrofuran (THF) at room temperature.

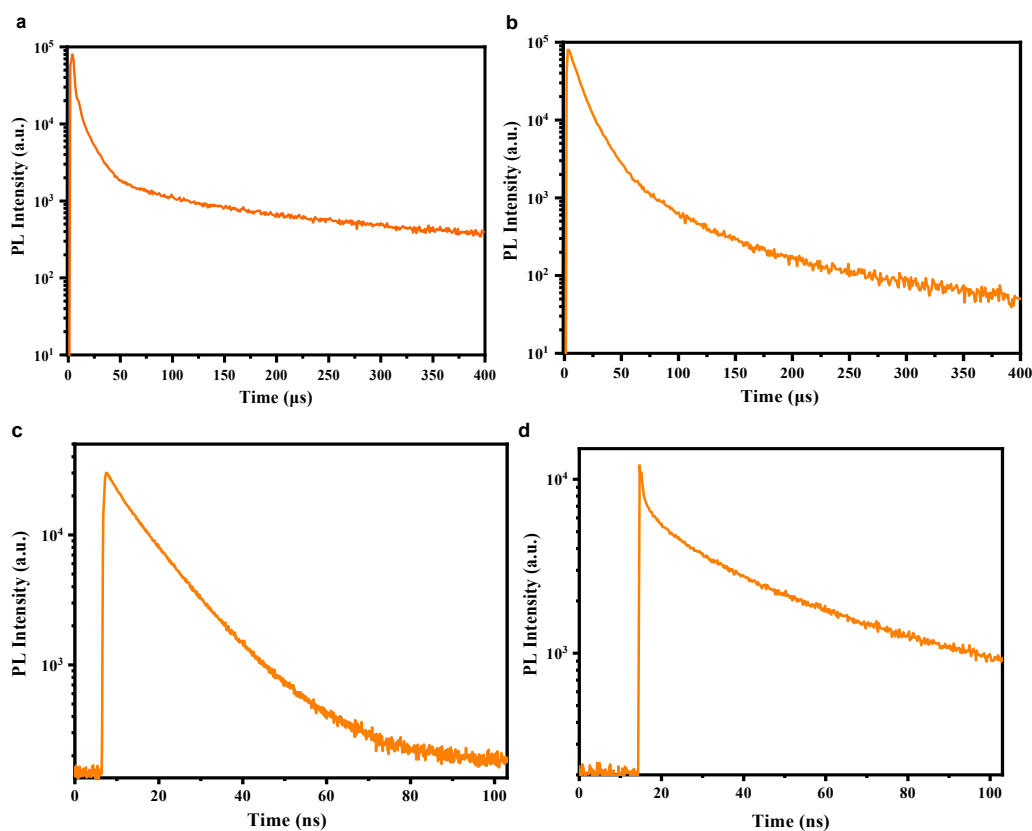

**Fig. S6** Transient PL decay curves of 5 wt% AQ-PhDMAC doped CBP films in a range of a) 400  $\mu$ s and c) 100 ns at room temperature. Transient PL decay curves of 5 wt% AQ-DMAC doped CBP films in a range of b) 400  $\mu$ s and c) 103 ns at room temperature. (Excited at 300 nm)

## 7. Device Fabrication and Characterization

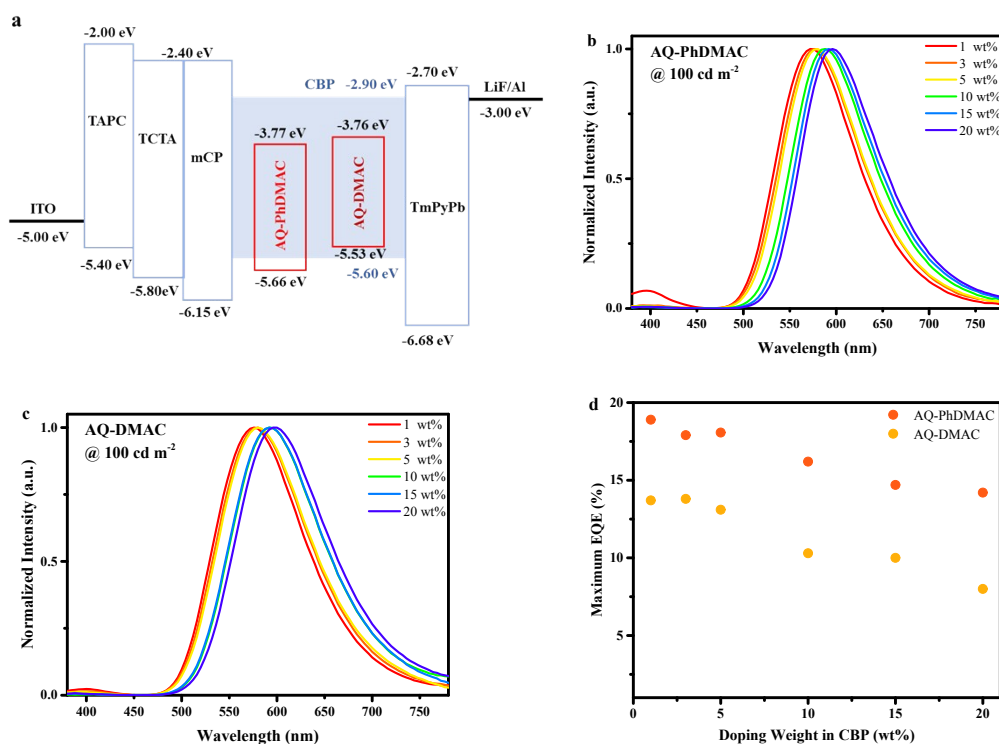

**Fig. S7** a) Energy diagram of the device; Normalized EL spectra of b) AQ-PhDMAC and c) AQ-DMAC 1 wt%, 3 wt%, 5 wt%, 10 wt%, 15 wt% and 20 wt% doped in CBP at 100 cd m<sup>-2</sup>; d) Maximum EQEs-Doping Weight in CBP characteristics of AQ-PhDMAC and AQ-DMAC.

**Tab. S1** Key dynamic parameter of the studied compounds 5 wt% doped CBP films.

|           | $\tau_p$<br>(ns) | $\tau_d$<br>( $\mu$ s) | $\phi_p$<br>(%) | $\phi_d$<br>(%) | $k_F$<br>( $10^7$ s <sup>-1</sup> ) | $k_d$<br>( $10^4$ s <sup>-1</sup> ) | $k_{ISC}$<br>( $10^7$ s <sup>-1</sup> ) | $k_{RISC}$<br>( $10^4$ s <sup>-1</sup> ) | $k_{IC}$<br>( $10^7$ s <sup>-1</sup> ) |
|-----------|------------------|------------------------|-----------------|-----------------|-------------------------------------|-------------------------------------|-----------------------------------------|------------------------------------------|----------------------------------------|
| AQ-PhDMAC | 8.7              | 63.6                   | 79.0            | 10.0            | 9.08                                | 1.57                                | 1.30                                    | 1.77                                     | 1.12                                   |
| AQ-DMAC   | 12.7             | 21.2                   | 27.4            | 35.6            | 2.16                                | 4.71                                | 4.45                                    | 10.80                                    | 1.27                                   |

**Tab. S2** Summary of the device performance.

|           | Doping Weight<br>(wt%) | V <sub>on</sub> <sup>a</sup><br>(V) | Peak<br>(nm) | Maximum CE/PE/EQE <sup>b</sup><br>(cd A <sup>-1</sup> /lm W <sup>-1</sup> /%) | CIE <sup>c</sup><br>(x, y) | FWHM <sup>d</sup><br>(nm) |
|-----------|------------------------|-------------------------------------|--------------|-------------------------------------------------------------------------------|----------------------------|---------------------------|
| AQ-PhDMAC | 1                      | 3.6                                 | 576          | 53.5/46.7/18.9                                                                | (0.47, 0.49)               | 100                       |
|           | 3                      | 3.6                                 | 576          | 48.9/42.7/17.9                                                                | (0.48, 0.49)               | 100                       |
|           | 5                      | 3.6                                 | 580          | 49.4/43.1/18.1                                                                | (0.49, 0.49)               | 100                       |
|           | 10                     | 3.4                                 | 588          | 38.1/35.2/16.2                                                                | (0.52, 0.47)               | 100                       |
|           | 15                     | 3.3                                 | 592          | 31.9/30.4/14.7                                                                | (0.54, 0.46)               | 100                       |
|           | 20                     | 3.4                                 | 596          | 29.4/27.1/14.3                                                                | (0.55, 0.44)               | 100                       |
| AQ-DMAC   | 1                      | 3.6                                 | 576          | 36.8/32.1/13.7                                                                | (0.48, 0.50)               | 110                       |
|           | 3                      | 3.6                                 | 580          | 36.0/31.4/13.9                                                                | (0.49, 0.49)               | 111                       |
|           | 5                      | 3.6                                 | 580          | 32.7/28.6/12.8                                                                | (0.50, 0.49)               | 111                       |
|           | 10                     | 3.6                                 | 588          | 22.8/17.1/10.4                                                                | (0.53, 0.47)               | 114                       |
|           | 15                     | 3.6                                 | 592          | 20.9/18.2/9.3                                                                 | (0.53, 0.47)               | 115                       |
|           | 20                     | 3.6                                 | 596          | 17.0/11.9/8.0                                                                 | (0.54, 0.46)               | 117                       |

<sup>a</sup>Turn on voltage defined at 1 cd m<sup>-2</sup>; <sup>b</sup>CE: current efficiency, PE: power efficiency and EQE: external quantum efficiency; <sup>c</sup>defined at 100 cd m<sup>-2</sup>; <sup>d</sup>FWHM: full width at half maximum.

## 8. Nuclear Magnetic Resonance Spectra

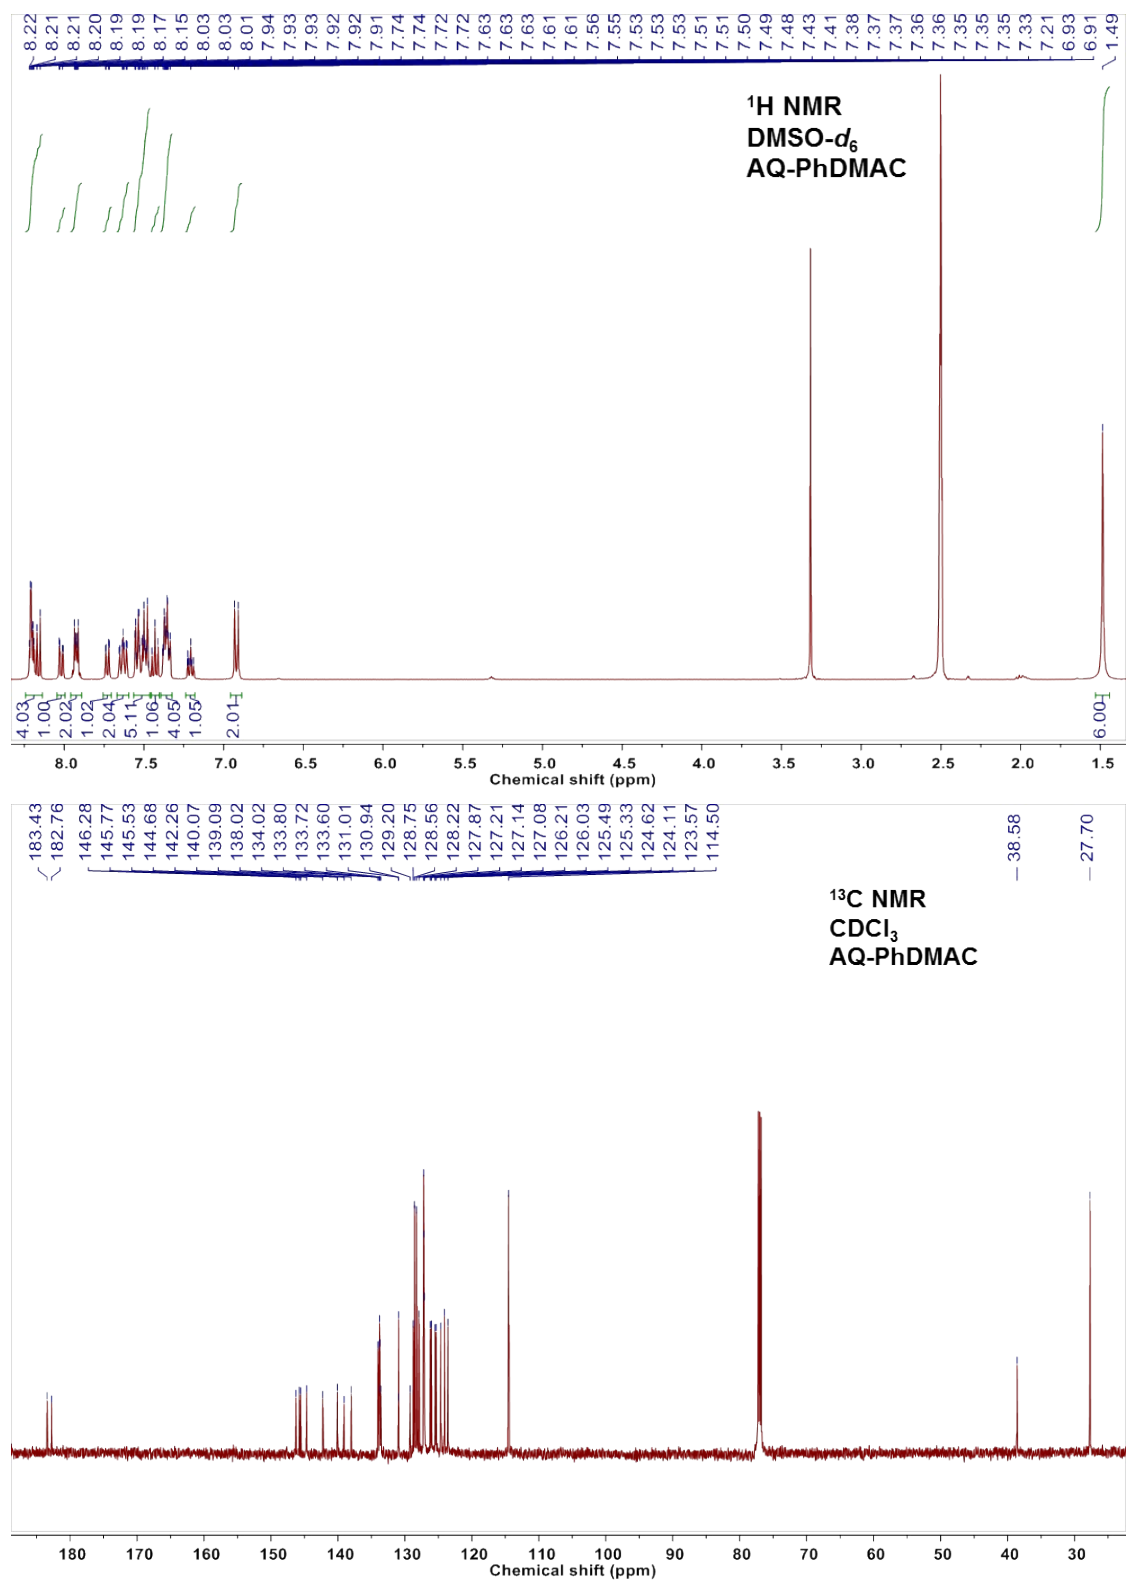

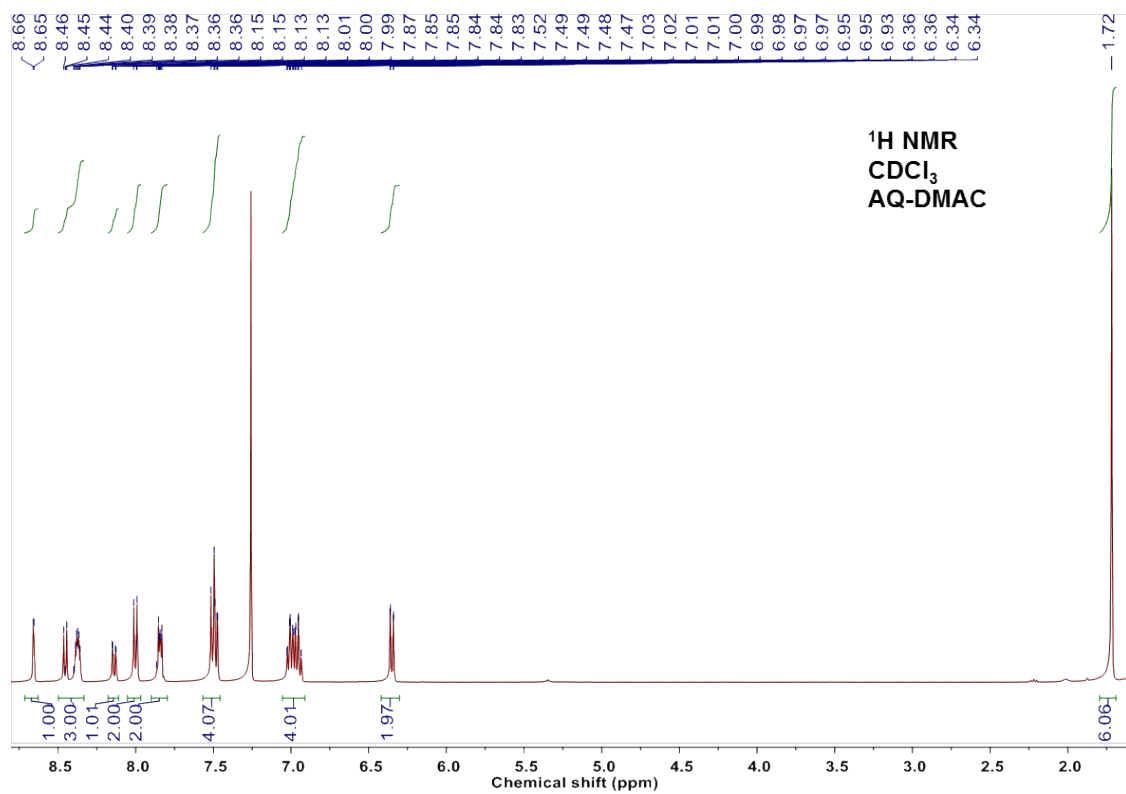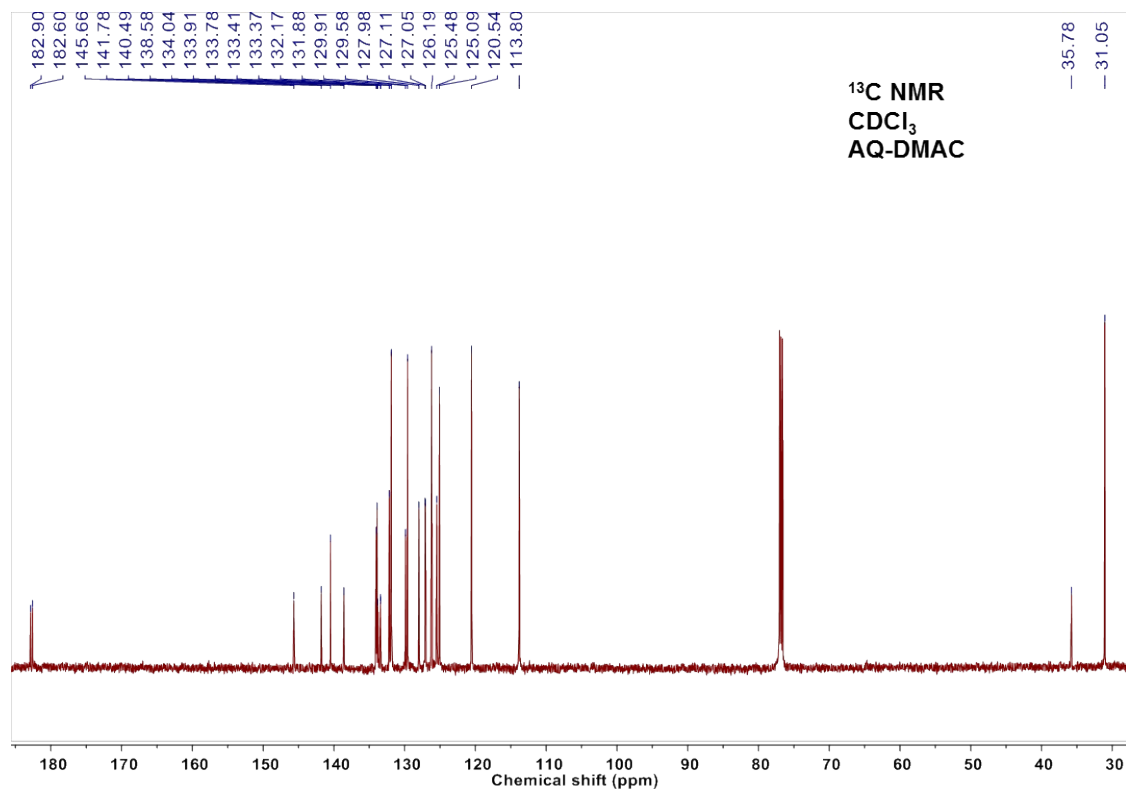

Supplement: d0tc02289f1.pdf [file d0tc02289f1.pdf]
